# Supplementary material for: The role of upper ocean heat content in the regional variability of Arctic sea ice at sub-seasonal time scales
Source: Copernicus journal article supplement (doi:10.5194/egusphere-2023-1406), 2023-09-11

(a) Barents + Kara

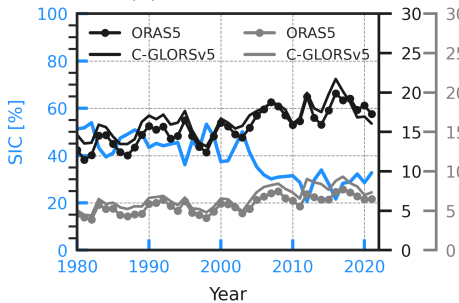

(b) Laptev + East Siberian

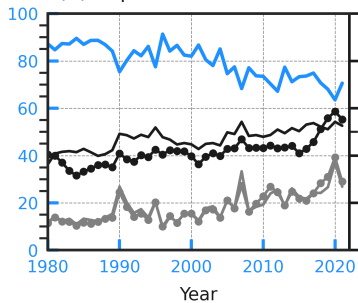

(c) Chukchi

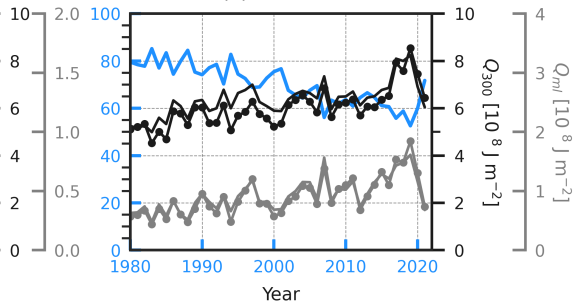

(d) Beaufort

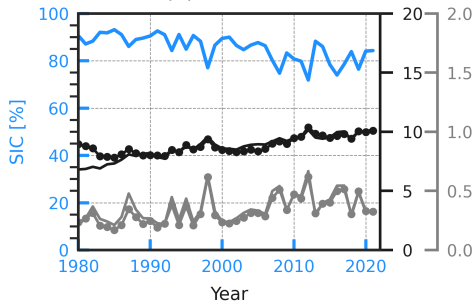

(e) Pan-Arctic

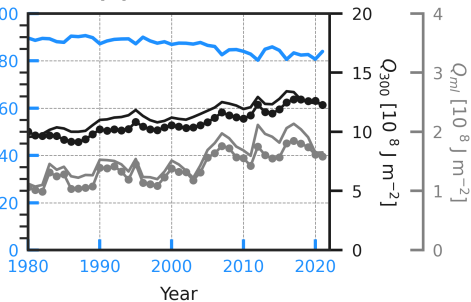

Supplement: Supplementary file [file egusphere-2023-1406-AC1-supplement.zip]
