# Supplementary material for: The role of upper ocean heat content in the regional variability of Arctic sea ice at sub-seasonal time scales
Source: Copernicus journal article supplement (doi:10.5194/egusphere-2023-1406), 2023-09-11
Supplement: Supplementary file [file egusphere-2023-1406-AC2-supplement.zip]

Table 1: Average Net Ocean Heat Transport (referenced to  $T_{ref} = 0^{\circ}\text{C}$ ) via Arctic Gates [TW] for the C-GLORSv5 and ORAS5 reanalyses and for existing observational and model estimates<sup>1</sup>

| Source                | Section/Gate  | Period                 | Full depth | Mixed layer | 0-300 m |
|-----------------------|---------------|------------------------|------------|-------------|---------|
| C-GLORSv5             | Fram Strait   | 1980-2000              | 20.7       | 9.1         | 12.2    |
|                       | BSO           | 1980-2000              | 77.4       | 37          | 72.9    |
|                       | Bering Strait | 1980-2000              | 7.1        | 3.1         | /       |
|                       | Davis Strait  | 1980-2000              | 13.4       | 3           | /       |
| C-GLORSv5             | Fram Strait   | 2001-2021              | 25.3       | 10.7        | 15.4    |
|                       | BSO           | 2001-2021              | 83.2       | 39.1        | 78.2    |
|                       | Bering Strait | 2001-2021              | 8          | 3.5         | /       |
|                       | Davis Strait  | 2001-2021              | 10.9       | 2.6         | /       |
| ORAS5                 | Fram Strait   | 1980-2000              | 27.6       | 14.5        | 16      |
|                       | BSO           | 1980-2000              | 70.1       | 34.5        | 65.4    |
|                       | Bering Strait | 1980-2000              | 8.5        | 3.9         | /       |
|                       | Davis Strait  | 1980-2000              | 17.1       | 3.7         | /       |
| ORAS5                 | Fram Strait   | 2001-2021              | 30         | 16.8        | 18.6    |
|                       | BSO           | 2001-2021              | 83.1       | 35.7        | 78.2    |
|                       | Bering Strait | 2001-2021              | 9.4        | 4.2         | /       |
|                       | Davis Strait  | 2001-2021              | 15.1       | 3.2         | /       |
| Observations          |               |                        |            |             |         |
| Tsubouchi et al. 2019 | Fram Strait   | 2005-2009 <sup>2</sup> | 61.2       | /           | /       |
|                       | BSO           | 2005-2009              | 64.5       | /           | /       |
|                       | Bering Strait | 2005-2009              | 2.14       | /           | /       |
|                       | Davis Strait  | 2005-2009              | 23.67      | /           | /       |
| Model Simulations     |               |                        |            |             |         |
| Muilwijk et al. 2018  | Fram Strait   | 1890-2009              | 10-30      | /           | /       |
|                       | BSO           | 1890-2009              | 30-60      | /           | /       |
|                       | Bering Strait | 1890-2009              | 0-5        | /           | /       |
|                       | Davis Strait  | 1890-2009              | 5-15       | /           | /       |

<sup>1</sup> Averages for C-GLORSv5 and ORAS5 are computed from monthly net heat transports. OHT for the 0-300 m layer is marked as '/' if the section depth is shallower than 300 m and values therefore correspond to the full depth OHT.

<sup>2</sup> Values refer to Jan 2005 - Dec 2009 averages based on mooring data (details in Tsubouchi et al. 2018).
